# Supplementary material
Source: Springer Nature journal article supplement (https://www.springermedizin.de/resource/supplementary/12875_2010_536_MOESM2_ESM.pdf/9434890)
Supplement: MOESM2 [file 9434890]

**Table 2: Interview participants by professional groups, round one and two**

|                                     | <b>Round 1</b> | <b>Round 2</b> |
|-------------------------------------|----------------|----------------|
| <b>Physicians</b>                   | <b>6</b>       | <b>3</b>       |
| <b>Nursing Staff (RN + RPN)</b>     | <b>2</b>       | <b>2</b>       |
| <b>Nurse Practitioners</b>          | <b>4</b>       | <b>1</b>       |
| <b>Pharmacists</b>                  | <b>3</b>       | <b>1*</b>      |
| <b>Social Workers</b>               | <b>2</b>       | <b>0</b>       |
| <b>Dieticians</b>                   | <b>3</b>       | <b>1</b>       |
| <b>Management</b>                   | <b>2</b>       | <b>2*</b>      |
| <b>Administrative Support Staff</b> | <b>2</b>       | <b>0</b>       |
| <b>TOTAL</b>                        | <b>24</b>      | <b>10</b>      |

\*indicates that one individual was interviewed in both rounds of the study.
